# Supplementary material
Source: publisher figshare collection journal article supplement (https://geolsoc.figshare.com/ndownloader/files/5424521)
Supplement: Supplementary file 1 [file 5424521]

Supplementary Data Table 3.
Calculated activities for pure end-members from the greenschist
phases in EG-N2 using THERMOCALC v. 2.75 (Powell & Holland, 1998)
System	Phase		Analysis	End member*	Activity (a)	std. (a)
NCMASH	Chlorite		11	clin	0.0238	0.0070
				daph	0.0560	0.0118
				ames	0.3625	0.0725
	Amphibolie		3	tr	0.1000	0.0249
				fact	0.0100	0.0036
				ts	0.0008	0.0005
	Plagioclase		3	an	0.2600	0.0285
				ab	0.9800	0.0489
	Epidote		3	cz	0.64	0.0635
				ep	0.36	0.0365
	Quartz			q	1
				H2O	1
* clin - clinochlore. daph - daphnite. ames - amesite. tr - tremolite. fact - ferroactinolite.
ts - tschermakite. an -anorthite. ab - albite. cz - clinozoisite. ep - epidote.
std. = standard deviation.
